# Supplementary material for: Birth prevalence of phenylalanine hydroxylase deficiency: a systematic literature review and meta-analysis
Source: PubMed Central journal article supplement (PMC8173927; doi:10.1186/s13023-021-01874-6), 2021-06-03
Supplement: 13023_2021_1874_MOESM3_ESM.pdf [file 13023_2021_1874_MOESM3_ESM.pdf]

## ADDITIONAL FILE 3

**Figure A-2. Meta-Analysis Results by Region: Confirmatory Test Phenylalanine Cutoff Value of  $360 \pm 100 \mu\text{mol/L}$**

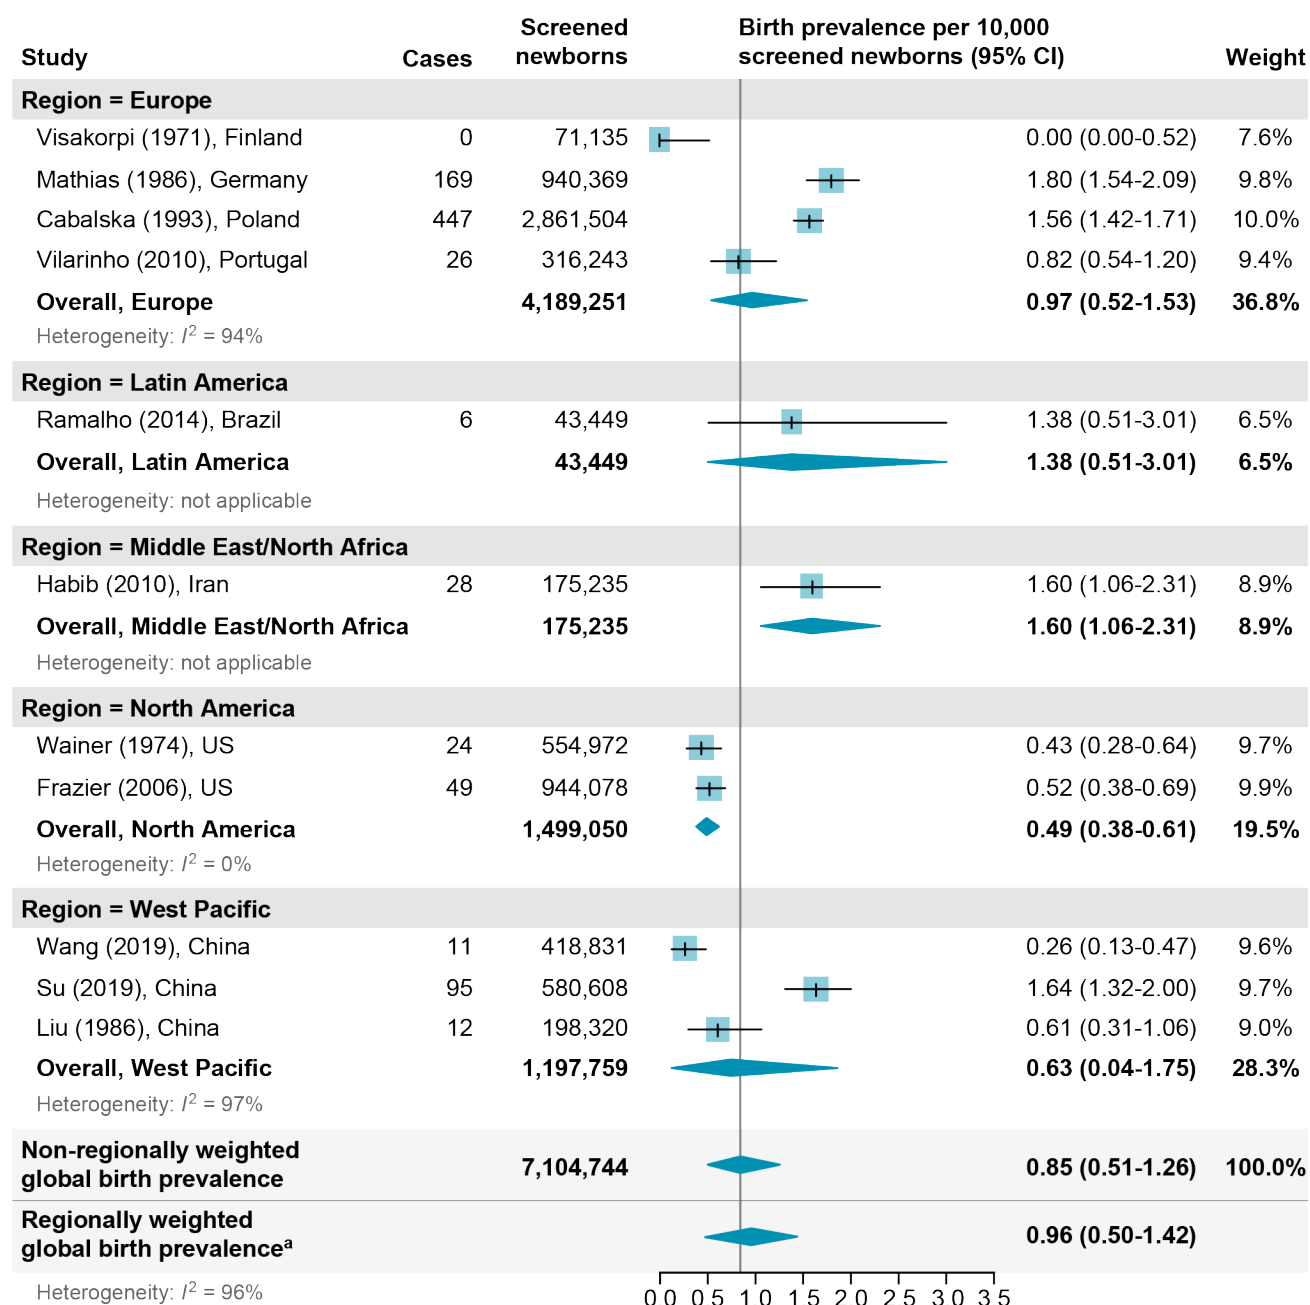

<sup>a</sup> The regionally weighted global prevalence was not produced directly as part of the meta-analysis but was calculated by taking a weighted average of the meta-analysis results for each of the regions, weighting them by the relative population size of each of these regions. We have added this prevalence estimate to the figure to facilitate comparison with the non-regionally weighted overall estimate from the meta-analysis.

**Figure A-3. Meta-Analysis Results by Region: Confirmatory Test Phenylalanine Cutoff Value of  $600 \pm 100 \mu\text{mol/L}$**

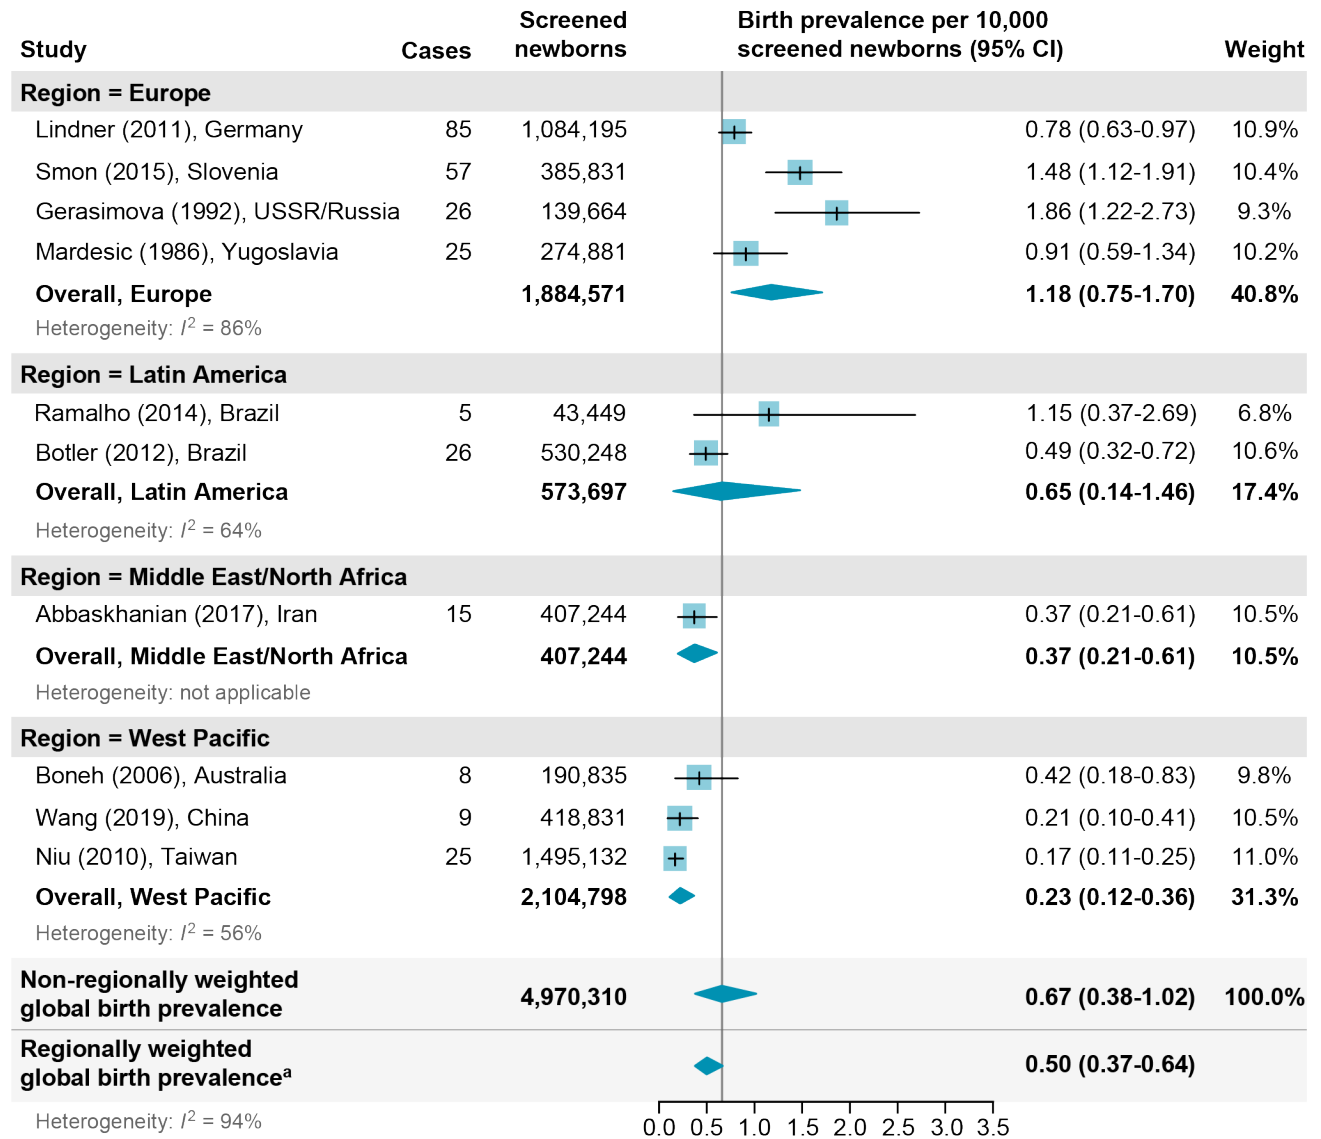

<sup>a</sup> The regionally weighted global prevalence was not produced directly as part of the meta-analysis but was calculated by taking a weighted average of the meta-analysis results for each of the regions, weighting them by the relative population size of each of these regions. We have added this prevalence estimate to the figure to facilitate comparison with the non-regionally weighted overall estimate from the meta-analysis.

**Figure A-4. Meta-Analysis Results by Region: Confirmatory Test Phenylalanine Cutoff Value of 1,200 ± 200 µmol/L**

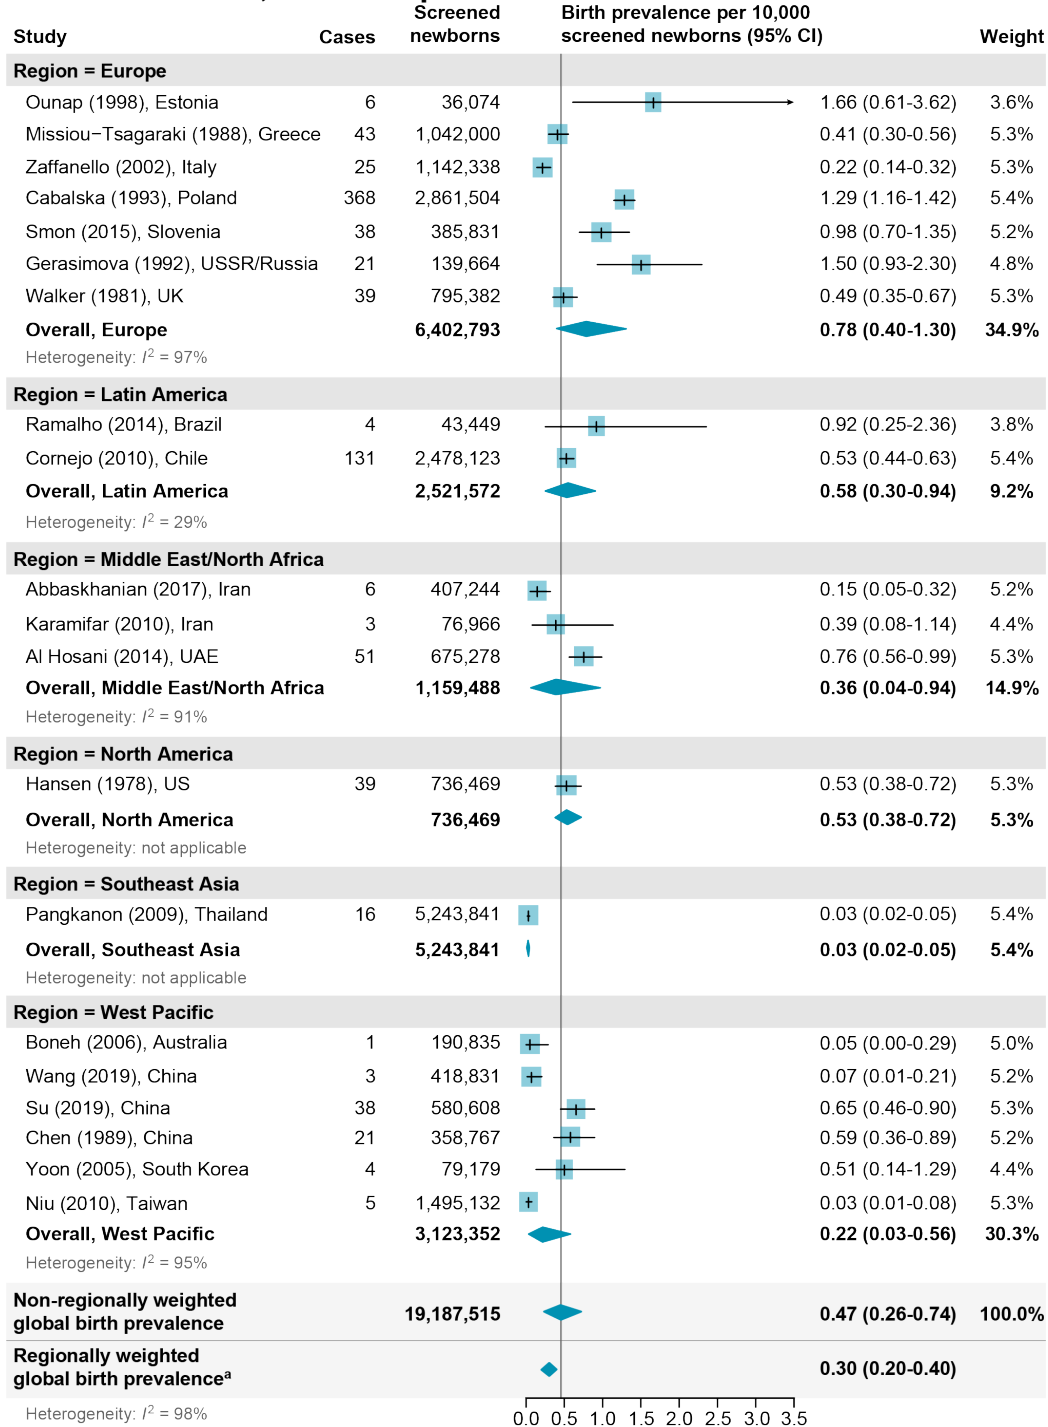

<sup>a</sup> The regionally weighted global prevalence was not produced directly as part of the meta-analysis but was calculated by taking a weighted average of the meta-analysis results for each of the regions, weighting them by the relative population size of each of these regions. We have added this prevalence estimate to the figure to facilitate comparison with the non-regionally weighted overall estimate from the meta-analysis.

**Figure A-5. Meta-Analysis Results by Region: Overall Analysis**

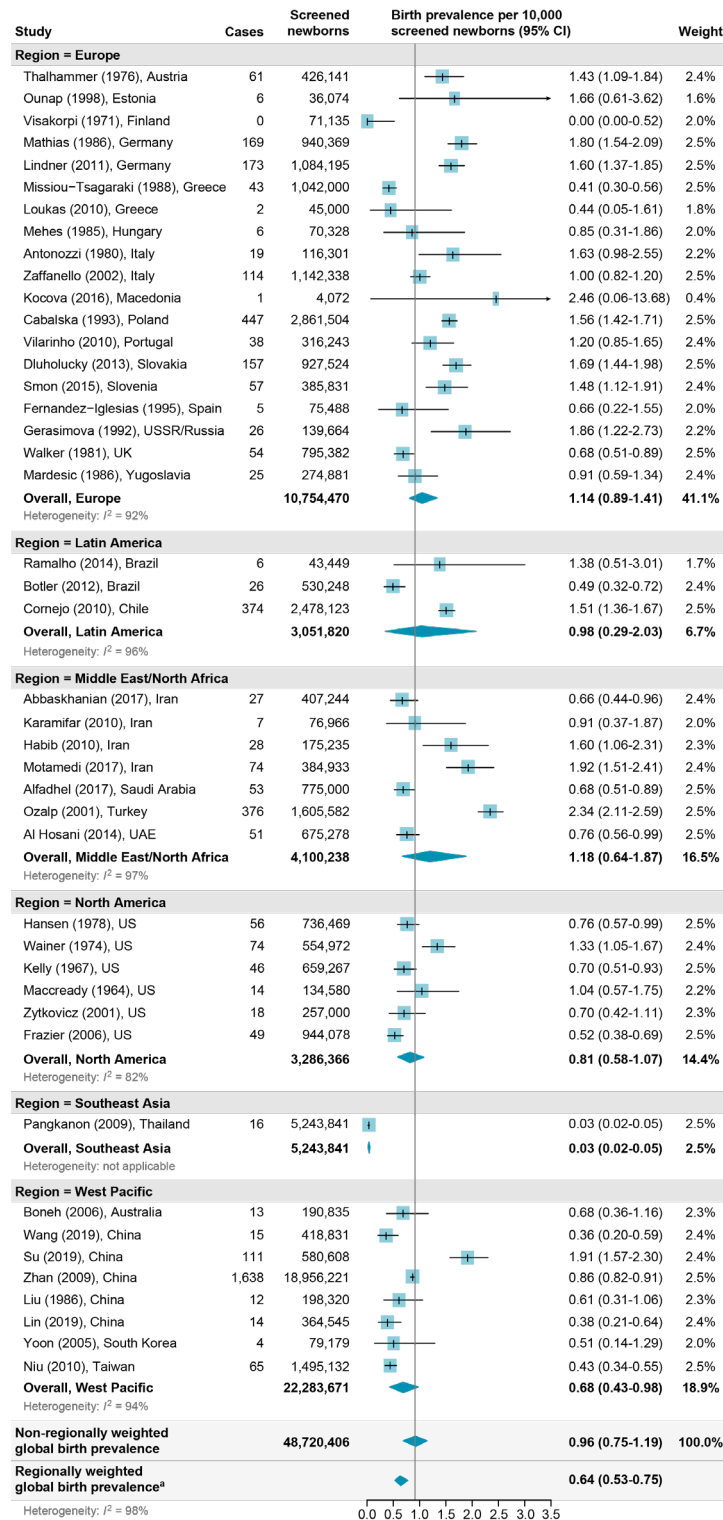

<sup>a</sup> The regionally weighted global prevalence was not produced directly as part of the meta-analysis but was calculated by taking a weighted average of the meta-analysis results for each of the regions, weighting them by the relative population size of each of these regions. We have added this prevalence estimate to the figure to facilitate comparison with the non-regionally weighted overall estimate from the meta-analysis.
